# Supplementary material for: Long-Term, Simultaneous Impact of Antimicrobials on the Efficiency of Anaerobic Digestion of Sewage Sludge and Changes in the Microbial Community
Source: MDPI journal article supplement (doi:10.3390/en15051826), 2022-03-01
Supplement: s1 [file s1]

# Long-term, simultaneous impact of antimicrobials on the efficiency of anaerobic digestion of sewage sludge and changes in the microbial community

Małgorzata Czatzkowska<sup>1</sup>, Monika Harnisz<sup>1\*</sup>, Ewa Korzeniewska<sup>1</sup>, Izabela Wolak<sup>1</sup>, Paulina Rusanowska<sup>2</sup>, Łukasz Pauksto<sup>3</sup>, Jan P. Jastrzębski<sup>3</sup> and Sylwia Bajkacz<sup>4,5</sup>

<sup>1</sup> Department of Water Protection Engineering and Environmental Microbiology, University of Warmia and Mazury in Olsztyn, Prawocheńskiego 1, 10-720 Olsztyn, Poland; malgorzata.czatzkowska@uwm.edu.pl (M.C.); ewa.korzeniewska@uwm.edu.pl (E.K.); izabela.koniuszewska@uwm.edu.pl (I.W.)

<sup>2</sup> Department of Environmental Engineering, University of Warmia and Mazury in Olsztyn, Warszawska 117a, 10-720 Olsztyn, Poland; paulina.jaranowska@uwm.edu.pl

<sup>3</sup> Department of Plant Physiology, Genetics and Biotechnology, University of Warmia and Mazury in Olsztyn, Oczapowskiego 1A, 10-719 Olsztyn, Poland; pauk24@gmail.com (Ł.P.); jan.jastrzebski@uwm.edu.pl (J.P.J.)

<sup>4</sup> Department of Inorganic, Analytical Chemistry and Electrochemistry, Silesian University of Technology, Krzywoustego 6, 44-100 Gliwice, Poland; sylwia.bajkacz@polsl.pl (S.B.);

<sup>5</sup> Centre for Biotechnology, Silesian University of Technology, Krzywoustego 8, 44-100 Gliwice, Poland

\* Correspondence: monikah@uwm.edu.pl or monika.harnisz@uwm.edu.pl

**Supplementary materials**

**Table S1.** The mean values of pH, FOS/TAC ratio, TS, VS, TP and TN in each of the experimental series in the control (CB) and process (PB) bioreactors. TS-total solids, VS-volatile solids, TP-total phosphorus, TN- total nitrogen

|                              | Digesters | pH     | FOS/TAC<br>[mg/g] | TS<br>[mg/g] | VS<br>[mg/g] | TP<br>[mg/g] | TN<br>[mg/g] |
|------------------------------|-----------|--------|-------------------|--------------|--------------|--------------|--------------|
| <b>Experimental series 1</b> | CB        | 7,55 ± | 0,20 ±            | 30,55 ±      | 21,28 ±      | 2,02 ±       | 3,27 ±       |
|                              |           | 0,09   | 0,05              | 2,56         | 1,69         | 0,10         | 0,18         |
|                              | PB        | 7,49 ± | 0,23 ±            | 31,00 ±      | 21,48 ±      | 1,58 ±       | 3,43 ±       |
|                              |           | 0,07   | 0,06              | 1,71         | 1,23         | 0,24         | 0,44         |
| <b>Experimental series 2</b> | CB        | 7,74 ± | 0,19 ±            | 35,86 ±      | 25,47 ±      | 1,47 ±       | 3,72 ±       |
|                              |           | 0,08   | 0,03              | 1,14         | 0,70         | 0,21         | 0,21         |
|                              | PB        | 7,73 ± | 0,19 ±            | 35,77 ±      | 25,23 ±      | 1,55 ±       | 3,75 ±       |
|                              |           | 0,08   | 0,03              | 0,80         | 0,63         | 0,27         | 0,22         |
| <b>Experimental series 3</b> | CB        | 7,87 ± | 0,17 ±            | 38,31 ±      | 26,91 ±      | 1,68 ±       | 4,01 ±       |
|                              |           | 0,14   | 0,02              | 2,28         | 1,95         | 0,31         | 0,31         |
|                              | PB        | 7,88 ± | 0,17 ±            | 38,33 ±      | 26,75 ±      | 1,59 ±       | 3,99 ±       |
|                              |           | 0,10   | 0,02              | 3,17         | 2,82         | 0,18         | 0,34         |
| <b>Experimental series 4</b> | CB        | 7,99 ± | 0,15 ±            | 39,93 ±      | 27,94 ±      | 1,67 ±       | 4,08 ±       |
|                              |           | 0,12   | 0,01              | 0,57         | 0,92         | 0,20         | 0,21         |
|                              | PB        | 7,94 ± | 0,16 ±            | 40,24 ±      | 28,21 ±      | 1,77 ±       | 4,21 ±       |
|                              |           | 0,15   | 0,01              | 0,86         | 0,77         | 0,28         | 0,20         |
| <b>Experimental series 5</b> | CB        | 7,85 ± | 0,16 ±            | 47,05 ±      | 31,63 ±      | 1,85 ±       | 4,72 ±       |
|                              |           | 0,09   | 0,02              | 3,81         | 4,19         | 0,36         | 0,22         |
|                              | PB        | 7,83 ± | 0,16 ±            | 44,75 ±      | 30,21 ±      | 1,78 ±       | 4,33 ±       |
|                              |           | 0,09   | 0,01              | 2,85         | 1,16         | 0,30         | 0,22         |
| <b>Experimental series 6</b> | CB        | 7,66 ± | 0,17 ±            | 39,08 ±      | 28,25 ±      | 1,83 ±       | 4,26 ±       |
|                              |           | 0,08   | 0,02              | 3,22         | 1,09         | 0,32         | 0,33         |
|                              | PB        | 7,67 ± | 0,17 ±            | 38,09 ±      | 28,54 ±      | 1,44 ±       | 4,18 ±       |
|                              |           | 0,08   | 0,02              | 3,30         | 0,52         | 0,38         | 0,29         |

**Table S2.** Differences in methane production between samples from process and control bioreactors (two-way ANOVA;  $p < 0.05$ ).

| % of total variation | P-value | P-value summary | Significant | SS value | DF value | MS value | F-ratio (DFn, DFd) |
|----------------------|---------|-----------------|-------------|----------|----------|----------|--------------------|
| 0.5632               | 0.0265  | *               | Yes         | 532.2    | 1        | 532.1    | F (1, 32) = 5.408  |

**Table S3.** Differences in VFA (volatile fatty acid) content between samples from process and control bioreactors (two-way ANOVA;  $p < 0.05$ ).

| VFA             | % of total variation | P-value | P-value summary | Significant | SS value | DF value | MS value | F-ratio (DFn, DFd)   |
|-----------------|----------------------|---------|-----------------|-------------|----------|----------|----------|----------------------|
| Acetic acid     | 1.292                | 0.2374  | ns              | No          | 0.2576   | 1        | 0.2576   | F (1, 32) = 1.450    |
| Propionic acid  | 3.123                | 0.0731  | ns              | No          | 0.05075  | 1        | 0.05075  | F (1, 32) = 3.434    |
| Isobutyric acid | 2.423                | 0.1382  | ns              | No          | 0.03048  | 1        | 0.03048  | F (1, 32) = 2.312    |
| Butyric acid    | 0.8648               | 0.4376  | ns              | No          | 0.02573  | 1        | 0.02573  | F (1, 32) = 0.6179   |
| Isovaleric acid | 0.2052               | 0.625   | ns              | No          | 0.02083  | 1        | 0.02083  | F (1, 32) = 0.2436   |
| Valeric acid    | 0.0793               | 0.8241  | ns              | No          | 0.001212 | 1        | 0.001212 | F (1, 32) = 0.05024  |
| Isocaproic acid | 0.3301               | 0.6751  | ns              | No          | 0.02161  | 1        | 0.02161  | F (1, 32) = 0.1789   |
| Caproic acid    | 0.01006              | 0.9288  | ns              | No          | 0.001877 | 1        | 0.001877 | F (1, 32) = 0.008120 |
| Heptanoic acid  | 1.365                | 0.3604  | ns              | No          | 0.002855 | 1        | 0.002855 | F (1, 32) = 0.8608   |

**Table S4.** Sequencing analysis data presenting the abundance of dominant bacterial phyla in all sequenced samples, expressed in reads per million reads [ppm].

| Sample ID | <i>Firmicutes</i> | <i>Nitrospirae</i> | <i>Chloroflexi</i> | <i>Tenericutes</i> | <i>Acidobacteria</i> | <i>Bacteroidetes</i> | <i>Actinobacteria</i> | <i>Proteobacteria</i> | <i>Candidatus Cloacimonetes</i> | <i>Archaea</i> |
|-----------|-------------------|--------------------|--------------------|--------------------|----------------------|----------------------|-----------------------|-----------------------|---------------------------------|----------------|
| D1.1      | 21.62496          | 0.31316            | 1.33813            | 0.07013            | 45.51847             | 1.68763              | 16.10544              | 2.24161               | 0.42462                         | 10.67584       |
| D1.2      | 7.45391           | 0.39086            | 1.73622            | 0.02501            | 49.86144             | 2.78293              | 19.40291              | 4.47644               | 0.49421                         | 13.37608       |
| D1.4      | 4.74143           | 0.24791            | 1.84211            | 0.09987            | 46.17285             | 3.66507              | 19.06551              | 8.55573               | 0.5028                          | 15.09418       |
| D2.1      | 1.58303           | 6.91334            | 0.53073            | 0.16397            | 50.77718             | 3.71467              | 9.58201               | 7.41782               | 5.42605                         | 13.89119       |
| D2.3      | 2.75677           | 4.10148            | 0.29982            | 0.03093            | 47.5041              | 4.08178              | 7.43576               | 10.7416               | 7.82287                         | 15.2249        |
| D2.5      | 2.92099           | 2.48799            | 0.27388            | 0.03666            | 47.01472             | 2.81063              | 11.47948              | 12.96225              | 7.62673                         | 12.38666       |
| D3.1      | 2.7468            | 1.75426            | 0.18408            | 0.04593            | 45.26079             | 3.0166               | 5.16664               | 13.37711              | 10.79395                        | 17.65384       |
| D3.3      | 3.62197           | 0.63007            | 0.19703            | 0.09217            | 40.01094             | 5.15355              | 7.80937               | 9.17684               | 14.58717                        | 18.72089       |
| D3.4      | 3.6649            | 1.25128            | 0.02581            | 0.14557            | 35.19761             | 4.13275              | 7.92466               | 14.96819              | 19.41701                        | 13.27222       |
| D4.1      | 4.12036           | 1.76782            | 0.35746            | 0.20918            | 30.77452             | 5.1053               | 16.50538              | 15.0247               | 6.16551                         | 19.96977       |
| D4.4      | 5.54465           | 1.39268            | 0.15659            | 0.09338            | 39.06272             | 5.51519              | 9.81098               | 13.65583              | 6.84632                         | 17.92165       |
| D4.5      | 5.68011           | 2.74548            | 0.21031            | 0.1027             | 32.9642              | 3.81911              | 11.65063              | 14.93561              | 6.14817                         | 21.74369       |
| D5.1      | 3.1788            | 1.10734            | 0.17288            | 0.06603            | 42.8792              | 5.99212              | 8.09403               | 11.89138              | 7.74401                         | 18.8608        |
| D5.3      | 2.85418           | 1.49611            | 0.53846            | 0                  | 40.94243             | 5.80337              | 12.25198              | 11.00974              | 6.78587                         | 18.13682       |
| D5.5      | 2.06849           | 1.1025             | 0                  | 0.03751            | 53.93506             | 4.10642              | 2.90057               | 9.67525               | 8.54774                         | 17.62646       |
| D6.1      | 1.46702           | 1.69156            | 0.06762            | 0.33875            | 55.14094             | 2.81976              | 2.70574               | 7.28733               | 9.12501                         | 19.35627       |
| D6.3      | 2.47678           | 3.49117            | 0.43375            | 0.16861            | 37.93933             | 3.36762              | 9.62044               | 8.09879               | 7.59095                         | 26.81257       |
| D6.5      | 2.2153            | 3.65454            | 0.49121            | 0.19632            | 38.05324             | 5.92532              | 10.2654               | 4.98817               | 9.61102                         | 24.59948       |
| C1.1      | 4.06679           | 0.29829            | 1.47576            | 0                  | 52.9495              | 3.67964              | 19.59078              | 3.17682               | 0.26118                         | 14.50122       |
| C4.1      | 5.13474           | 1.37716            | 0.42321            | 0                  | 32.87294             | 3.89203              | 18.59797              | 12.37394              | 7.04387                         | 18.28413       |
| C6.5      | 0.96387           | 3.88559            | 0.01971            | 0.02864            | 68.48818             | 1.80641              | 3.51159               | 3.75938               | 9.94369                         | 7.59294        |

D-dose ID, C-control samples

**Table S5.** Sequencing analysis data presenting the abundance of four orders of methanogens in all sequenced samples, expressed in reads per million reads [ppm].

| Sample ID | c_ <i>Methanobacteria</i><br>o_ <i>Methanobacteriales</i> | c_ <i>Methanomicrobia</i><br>o_ <i>Methanomicrobiales</i> | c_ <i>Methanomicrobia</i><br>o_ <i>Methanosarcinales</i> | c_ <i>Thermoplasmata</i><br>o_ <i>Methanomassiliicoccales</i> |
|-----------|-----------------------------------------------------------|-----------------------------------------------------------|----------------------------------------------------------|---------------------------------------------------------------|
| D1.1      | 0.35787                                                   | 0                                                         | 10.19512                                                 | 0.12285                                                       |
| D1.2      | 0.48116                                                   | 0                                                         | 12.58544                                                 | 0.30948                                                       |
| D1.4      | 0.57622                                                   | 0                                                         | 14.51796                                                 | 0                                                             |
| D2.1      | 0.20555                                                   | 0.00907                                                   | 7.67928                                                  | 5.99729                                                       |
| D2.3      | 0.23513                                                   | 0                                                         | 6.88437                                                  | 8.1054                                                        |
| D2.5      | 0.43578                                                   | 0                                                         | 9.56336                                                  | 2.38753                                                       |
| D3.1      | 0.18818                                                   | 0.0883                                                    | 7.05033                                                  | 10.32703                                                      |
| D3.3      | 0.71645                                                   | 0                                                         | 13.24716                                                 | 4.75727                                                       |
| D3.4      | 0.92917                                                   | 0                                                         | 10.2155                                                  | 2.12755                                                       |
| D4.1      | 0.53003                                                   | 0                                                         | 18.42586                                                 | 1.01388                                                       |
| D4.4      | 0.40739                                                   | 0                                                         | 13.7039                                                  | 3.81036                                                       |
| D4.5      | 0.45345                                                   | 0                                                         | 16.73308                                                 | 4.55715                                                       |
| D5.1      | 0.61743                                                   | 0                                                         | 17.2107                                                  | 1.03267                                                       |
| D5.3      | 0.32637                                                   | 0                                                         | 16.40069                                                 | 1.40977                                                       |
| D5.5      | 0.41561                                                   | 0                                                         | 6.63666                                                  | 10.57418                                                      |
| D6.1      | 0.38356                                                   | 0                                                         | 6.29201                                                  | 12.6807                                                       |
| D6.3      | 0.5426                                                    | 0                                                         | 9.72868                                                  | 16.54128                                                      |
| D6.5      | 0.32881                                                   | 0                                                         | 9.24552                                                  | 15.02515                                                      |
| C1.1      | 0.35953                                                   | 0                                                         | 14.06668                                                 | 0.07501                                                       |
| C4.1      | 0.50199                                                   | 0                                                         | 16.48515                                                 | 1.29699                                                       |
| C6.5      | 0.17611                                                   | 0                                                         | 1.8877                                                   | 5.52912                                                       |

D-dose ID, C-control samples

**Table S6.** Correlations between the occurrence of *Archaea* in the process bioreactor (Spearman's rank correlation coefficient; significant results are marked in red,  $p < 0.05$ ).

|                                                          | <b>c__Methanobacteria <br/>o__Methanobacteriales</b> | <b>c__Methanomicrobia <br/>o__Methanomicrobiales</b> | <b>c__Methanomicrobia <br/>o__Methanosarcinales</b> | <b>c__Thermoplasmata <br/>o__Methanomassiliicoccales</b> |
|----------------------------------------------------------|------------------------------------------------------|------------------------------------------------------|-----------------------------------------------------|----------------------------------------------------------|
| <b>c__Methanobacteria <br/>o__Methanobacteriales</b>     | 1                                                    | -0.54612                                             | 0.539732                                            | -0.34985                                                 |
| <b>c__Methanomicrobia <br/>o__Methanomicrobiales</b>     | -0.54612                                             | 1                                                    | -0.34203                                            | 0.24188                                                  |
| <b>c__Methanomicrobia <br/>o__Methanosarcinales</b>      | 0.539732                                             | -0.34203                                             | 1                                                   | -0.68215                                                 |
| <b>c__Thermoplasmata <br/>o__Methanomassiliicoccales</b> | -0.34985                                             | 0.24188                                              | -0.68215                                            | 1                                                        |

**Table S7.** Correlations between the occurrence of bacterial phyla in the process bioreactor (Spearman's rank correlation coefficient; significant results are marked in red,  $p < 0.05$ ).

|                                     | <i>Firmicutes</i> | <i>Nitrospirae</i> | <i>Chloroflexi</i> | <i>Tenericutes</i> | <i>Acidobacteria</i> | <i>Bacteroidetes</i> | <i>Actinobacteria</i> | <i>Proteobacteria</i> | <i>Candidatus<br/>Cloacimonetes</i> | <i>Archaea</i> |
|-------------------------------------|-------------------|--------------------|--------------------|--------------------|----------------------|----------------------|-----------------------|-----------------------|-------------------------------------|----------------|
| <i>Firmicutes</i>                   | 1                 | -0.53973           | 0.287926           | -0.21362           | -0.38287             | -0.10836             | 0.682147              | 0.195046              | -0.511                              | -0.28999       |
| <i>Nitrospirae</i>                  | -0.53973          | 1                  | -0.0258            | 0.30031            | -0.14964             | 0.102167             | -0.22188              | 0.162023              | 0.160                               | 0.374613       |
| <i>Chloroflexi</i>                  | 0.287926          | -0.0258            | 1                  | -0.11868           | 0.038184             | -0.28173             | 0.770898              | -0.50464              | -0.717                              | -0.16615       |
| <i>Tenericutes</i>                  | -0.21362          | 0.30031            | -0.11868           | 1                  | -0.3581              | 0.083591             | -0.07946              | -0.01754              | 0.110                               | 0.496388       |
| <i>Acidobacteria</i>                | -0.38287          | -0.14964           | 0.038184           | -0.3581            | 1                    | -0.47368             | -0.29412              | -0.54386              | -0.102                              | -0.4902        |
| <i>Bacteroidetes</i>                | -0.10836          | 0.102167           | -0.28173           | 0.083591           | -0.47368             | 1                    | -0.13519              | 0.395253              | 0.368                               | 0.477812       |
| <i>Actinobacteria</i>               | 0.682147          | -0.22188           | 0.770898           | -0.07946           | -0.29412             | -0.13519             | 1                     | -0.08566              | -0.783                              | -0.13725       |
| <i>Proteobacteria</i>               | 0.195046          | 0.162023           | -0.50464           | -0.01754           | -0.54386             | 0.395253             | -0.08566              | 1                     | 0.261                               | 0.124871       |
| <i>Candidatus<br/>Cloacimonetes</i> | -0.511            | 0.160              | -0.717             | 0.110              | -0.102               | 0.368                | -0.783                | 0.261                 | 1                                   | 0.238          |
| <i>Archaea</i>                      | -0.28999          | 0.374613           | -0.16615           | 0.496388           | -0.4902              | 0.477812             | -0.13725              | 0.124871              | 0.238                               | 1              |



**Table S8.** Sequencing analysis data presenting the abundance of ARG classes in all sequenced samples, expressed in reads per million reads [ppm].

| Sample ID | TOTAL ARGs | aminoglycoside | bacitracin | beta-lactam | macrolide-lincosamide-streptogramin | multidrug | polymyxin | rifamycin | sulfonamide | tetracycline | vancomycin |
|-----------|------------|----------------|------------|-------------|-------------------------------------|-----------|-----------|-----------|-------------|--------------|------------|
| D1.1      | 93.61712   | 3.432852       | 6.846525   | 2.05204     | 32.61209                            | 26.12036  | 0.565749  | 1.534235  | 4.305448    | 11.59307     | 0.757529   |
| D1.2      | 94.36849   | 2.471946       | 8.323507   | 2.809908    | 35.74666                            | 23.46418  | 0.550394  | 1.48703   | 3.418238    | 11.32654     | 0.608331   |
| D1.4      | 100.0212   | 2.657332       | 10.96149   | 4.777335    | 34.93609                            | 24.28723  | 0.576406  | 1.182122  | 3.18489     | 11.68444     | 0.996499   |
| D2.1      | 95.64991   | 3.371546       | 8.0936     | 3.125999    | 30.41947                            | 29.31451  | 0.406097  | 1.019964  | 3.635981    | 12.25845     | 0.443873   |
| D2.3      | 92.62204   | 3.152807       | 7.324799   | 2.876579    | 29.88975                            | 25.37486  | 0.638181  | 0.99061   | 3.49571     | 14.59245     | 0.495305   |
| D2.5      | 96.71919   | 2.451343       | 7.420281   | 2.574383    | 35.35044                            | 24.63647  | 0.577343  | 1.73203   | 3.956221    | 13.94142     | 0.511091   |
| D3.1      | 104.5119   | 3.358969       | 8.618154   | 3.301387    | 30.47065                            | 32.53401  | 0.758167  | 1.190035  | 8.099913    | 10.78709     | 0.451062   |
| D3.3      | 102.0107   | 2.270058       | 6.791258   | 1.825505    | 42.91356                            | 20.53457  | 0.482387  | 1.664709  | 3.840182    | 17.91454     | 0.567515   |
| D3.4      | 97.45341   | 2.670347       | 8.676252   | 2.052651    | 33.46962                            | 25.45857  | 0.456145  | 1.976627  | 5.378706    | 13.17118     | 0.627199   |
| D4.1      | 87.5149    | 2.93044        | 9.047379   | 1.744987    | 27.52148                            | 24.92297  | 0.512116  | 1.735503  | 4.371951    | 10.60269     | 0.606952   |
| D4.4      | 79.67867   | 2.311647       | 7.442138   | 2.52623     | 20.90236                            | 24.43323  | 0.516951  | 1.892234  | 4.97443     | 10.88522     | 0.575473   |
| D4.5      | 81.46714   | 2.427416       | 8.85575    | 2.456199    | 16.85759                            | 28.77399  | 0.345403  | 1.73661   | 5.891041    | 9.728852     | 0.556483   |
| D5.1      | 72.34629   | 1.671016       | 6.519859   | 1.516471    | 23.24934                            | 20.69935  | 0.347726  | 1.516471  | 3.428963    | 9.784618     | 0.444316   |
| D5.3      | 86.41608   | 2.804981       | 7.895502   | 2.474428    | 20.05042                            | 30.7509   | 0.406108  | 1.520545  | 6.223846    | 9.312159     | 0.53833    |
| D5.5      | 85.97485   | 2.332048       | 6.743507   | 2.26403     | 26.52705                            | 25.0015   | 0.281789  | 1.136874  | 6.043892    | 11.45619     | 0.417825   |
| D6.1      | 87.9707    | 2.558798       | 6.781776   | 2.366407    | 29.74362                            | 25.9439   | 0.394401  | 1.317877  | 5.44466     | 9.475248     | 0.240489   |
| D6.3      | 95.63269   | 2.527951       | 8.433011   | 2.527951    | 28.96895                            | 31.32122  | 0.370896  | 1.3567    | 5.212069    | 10.03372     | 0.536824   |
| D6.5      | 88.06147   | 2.473637       | 8.191543   | 2.76857     | 24.32727                            | 29.03669  | 0.28542   | 0.884801  | 3.643857    | 11.67366     | 0.38056    |
| C1.1      | 95.70167   | 3.636512       | 7.839754   | 2.578618    | 30.7734                             | 28.22311  | 0.528947  | 1.473496  | 4.241024    | 10.91898     | 1.020113   |
| C4.1      | 90.9142    | 2.211089       | 8.479044   | 2.038047    | 30.62838                            | 25.08144  | 0.67294   | 1.701577  | 5.633469    | 10.33444     | 0.826755   |
| C6.5      | 90.86236   | 1.929096       | 5.952917   | 2.542899    | 32.53157                            | 27.38732  | 0.652775  | 0.828147  | 6.693378    | 9.031676     | 0.448174   |

D-dose ID, C-control samples

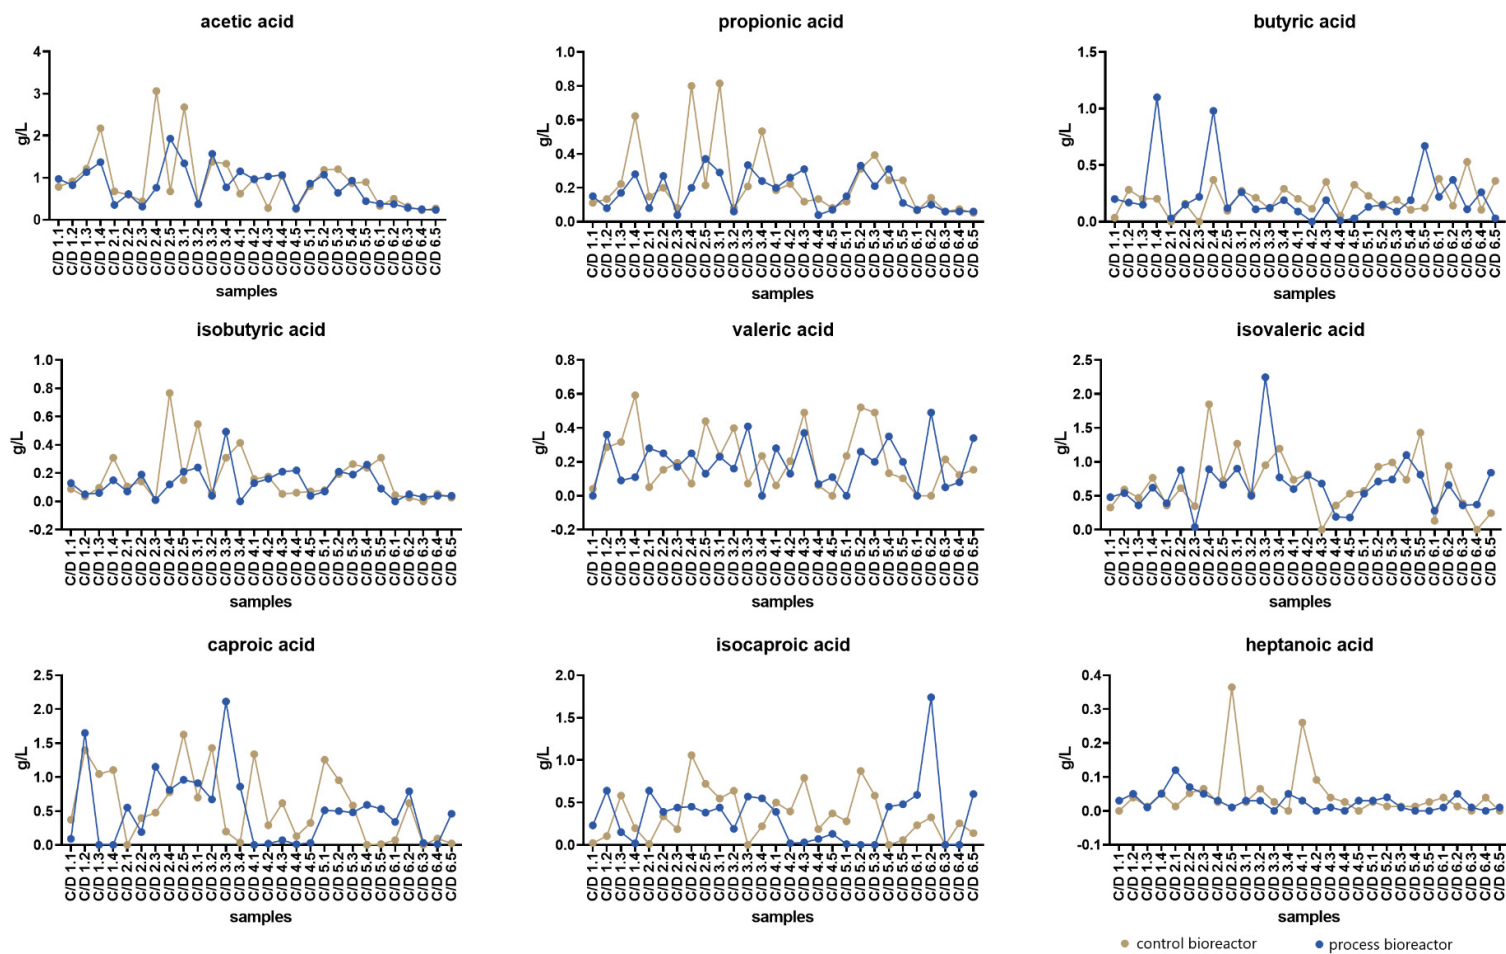

**Figure S1.** Content of VFAs (g/L) in bioreactors containing antimicrobials and in the control bioreactor. C-control samples, D-dose ID, VFAs-volatile fatty acids. For example, “C/D 1.1” indicates samples C1.1 and D1.1 (green and blue points on the line graph, respectively).

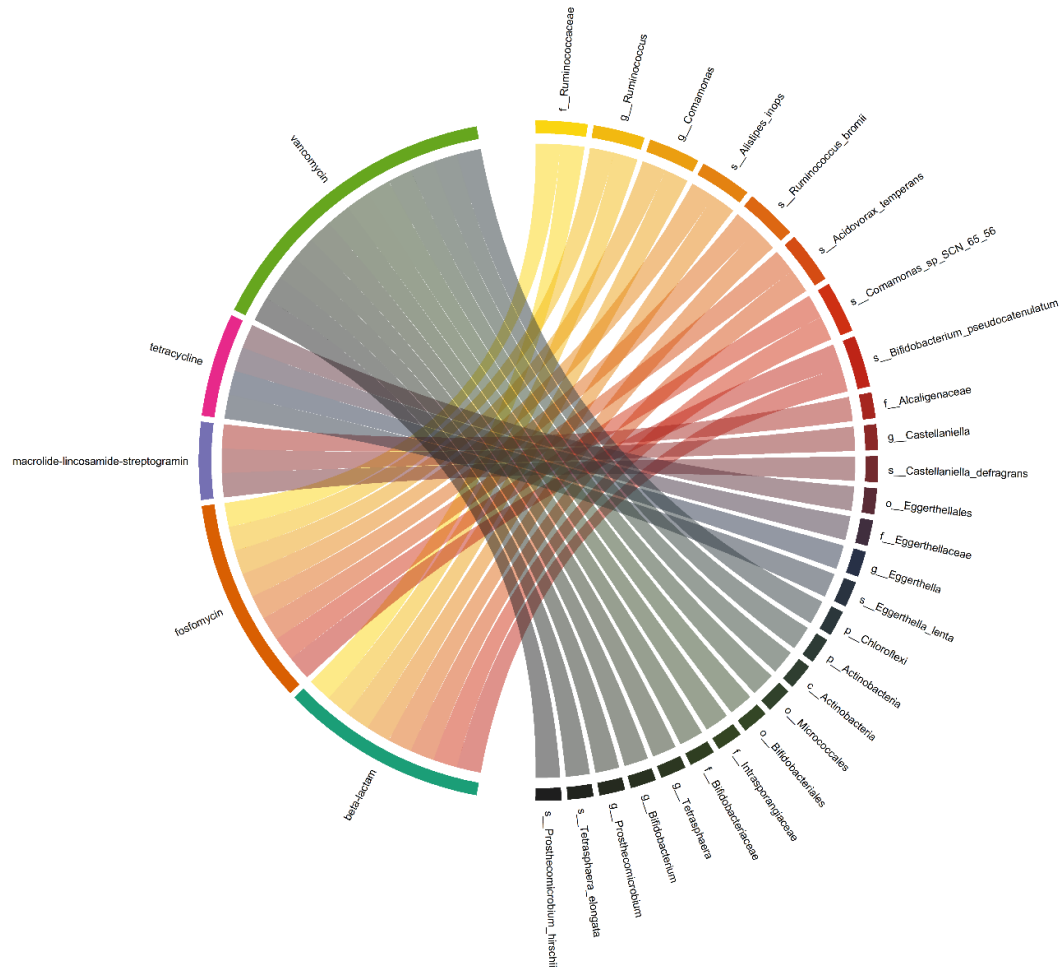

**Figure S2.** The taxonomic distribution of microbial diversity and ARG abundance in all sequenced samples of sewage sludge. The links describe the Pearson correlation ( $>0.7$ ,  $p < 0.05$ ) between the abundance of ARGs and the relative abundance of the bacterial community on different taxonomic levels.
